# Supplementary material for: Novel room-temperature full-Heusler thermoelectric material Li2TlSb
Source: Royal Society of Chemistry journal article supplement (doi:10.1039/d3cp05612k), 2024-01-01
Supplement: d3cp05612k8.pdf [file d3cp05612k8.pdf]

# Novel room-temperature Full-Heusler Thermoelectric material $\text{Li}_2\text{TlSb}$ <sup>†</sup>

Siqi Guo<sup>a</sup>, Jincheng Yue<sup>a</sup>, Junda Li<sup>a</sup>, Yanhui Liu <sup>\*a</sup> and Tian Cui <sup>†a,b</sup>

<sup>a</sup>*Institute of High Pressure Physics, School of Physical Science and Technology, Ningbo University, Ningbo 315211, China.*

<sup>b</sup>*State Key Laboratory of Superhard Materials, College of Physics, Jilin University, Changchun 130012, China*

January 17, 2024

## 1 Supplementary Tables

Table S1: The calculated elastic constants  $C_{ij}$  (GPa), bulk modulus  $B$  (GPa), Young's modulus  $E$  (GPa), shear modulus  $G$  (GPa), Poisson's ratio  $\nu$ , Pugh's Ratio ( $B/G$ ) for  $\text{Li}_2\text{TlSb}$ .

| Semiconductor            | $C_{11}$ | $C_{12}$ | $C_{44}$ | $B$  | $E$   | $G$   | $\nu$ | $B/G$ |
|--------------------------|----------|----------|----------|------|-------|-------|-------|-------|
| $\text{Li}_2\text{TlSb}$ | 78.88    | 9.31     | 18.15    | 32.5 | 57.05 | 23.62 | 0.207 | 1.376 |

Table S2: The calculated static dielectric constant  $\epsilon_s$ , Born effective charges  $Z^*$ , high-frequency dielectric constant  $\epsilon_\infty$ , effective polar optical phonon frequency  $\omega_{po}$  (THz), and Debey temperature  $\Theta_D$  (K) for  $\text{Li}_2\text{TlSb}$ .

| Semiconductor            | $\epsilon_s$ | $Z^*$ (Li) | $Z^*$ (Tl) | $Z^*$ (Sb) | $\epsilon_\infty$ | $\omega_{po}$ | $\Theta_D$ |
|--------------------------|--------------|------------|------------|------------|-------------------|---------------|------------|
| $\text{Li}_2\text{TlSb}$ | 125.59       | 1.46       | 3.49       | -6.42      | 51.86             | 3.55          | 225.7      |

\*Corresponding author:Email:liuyanhui@nbu.edu.cn

†Corresponding author:Email:cuitian@nbu.edu.cn

Table S3: Calculated temperature-dependent phonon frequency of lowest phonon modes at X and K point using the self-consistent phonon method (loop diagram) compared with that further including the bubble diagram, respectively.

|   |             | 100K  | 200K  | 300K  | 400K  | 500K  | 600K  | 700K  |
|---|-------------|-------|-------|-------|-------|-------|-------|-------|
| X | Loop        | 50.25 | 50.67 | 51.07 | 51.44 | 51.79 | 52.12 | 52.43 |
|   | Loop+Bubble | 49.2  | 49.4  | 50    | 50.4  | 50.89 | 51.29 | 51.66 |
| K | Loop        | 47.72 | 48.42 | 49.08 | 49.7  | 50.28 | 50.81 | 51.32 |
|   | Loop+Bubble | 45.8  | 46.7  | 47.6  | 48.3  | 49.07 | 49.7  | 50.3  |

## 2 Supplementary Figures

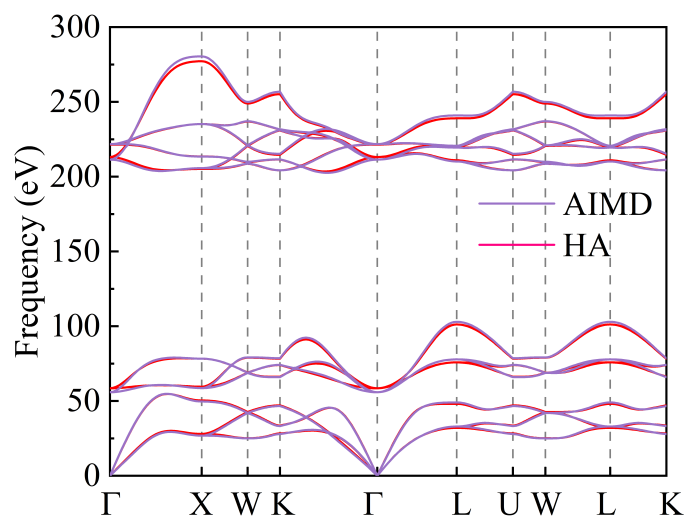

Figure S1: The comparison of phonon spectra is obtained from the phonon spectrum obtained from 60 snapshots and the phonon spectrum obtained from the harmonic force constant using the phonopy software.

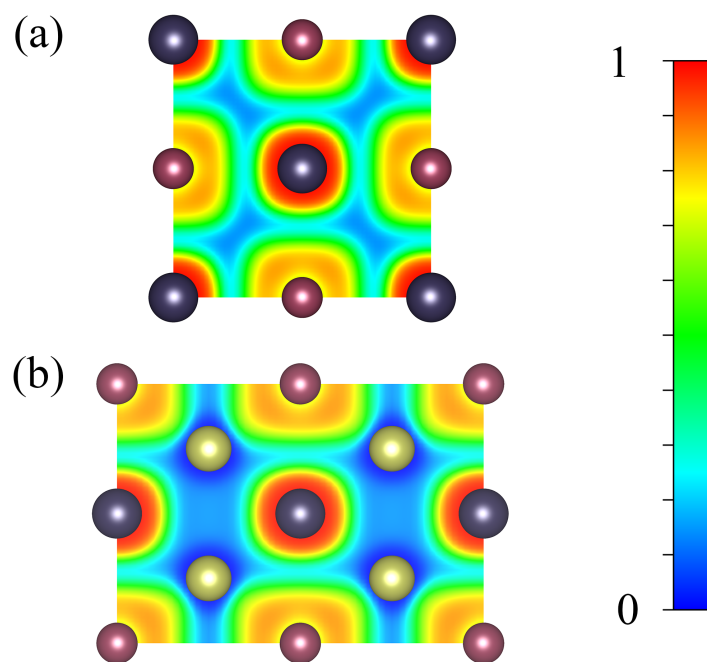

Figure S2: The calculated electronic local functions (ELF) of  $\text{Li}_2\text{TlSb}$  on (a) 100 and (b) 110 plane, respectively.

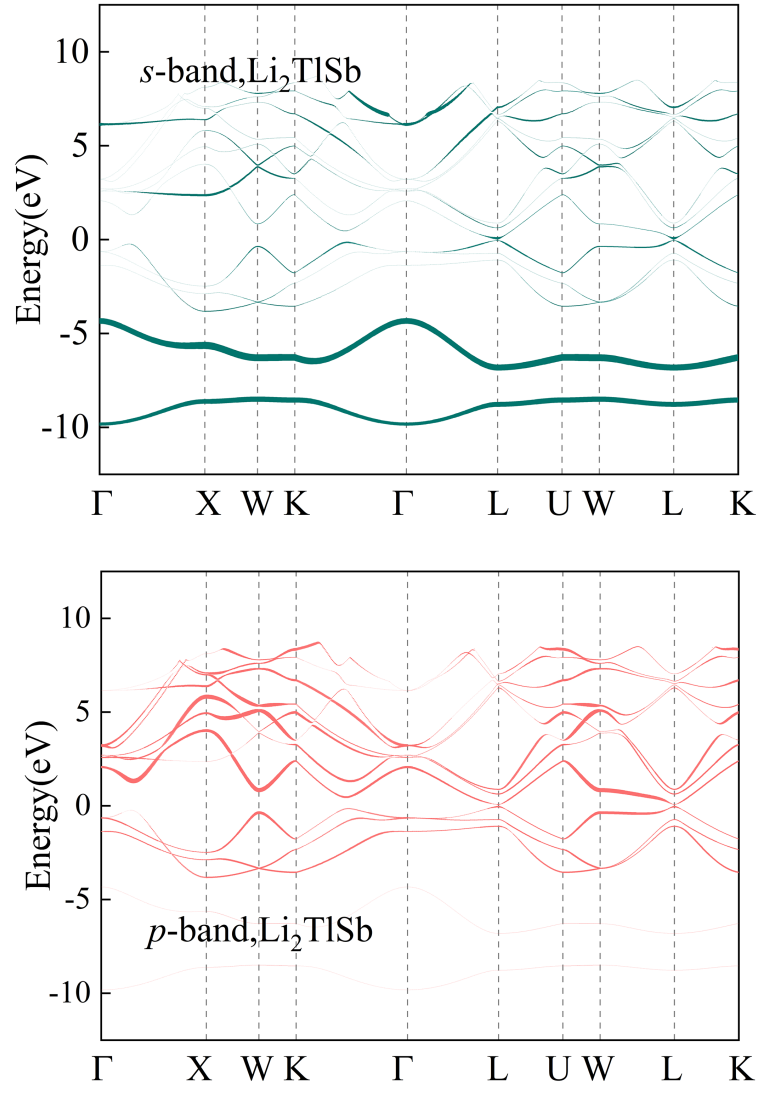

Figure S3: Weak *s-p* hybridization in  $\text{Li}_2\text{TlSb}$ , *k*-resolution projection band.

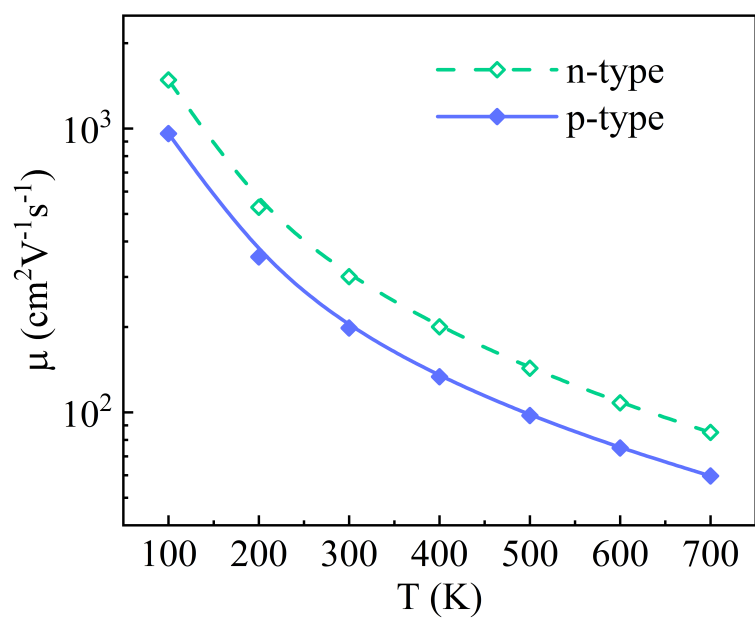

Figure S4: The function of carrier mobility with temperature was calculated, and the selected carrier concentration was  $2.04 \times 10^{18} \text{ cm}^{-3}$ .

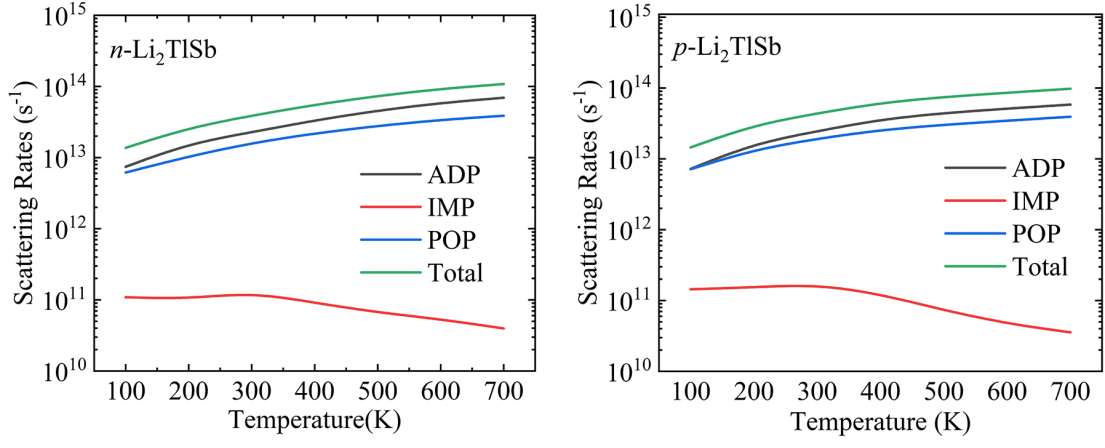

Figure S5: The ADP scattering rate, IMP scattering rate, and POP scattering rate calculated using the amset code as a function of temperature curves, and the selected doped carrier concentration is  $2.04 \times 10^{18} \text{ cm}^{-3}$ .

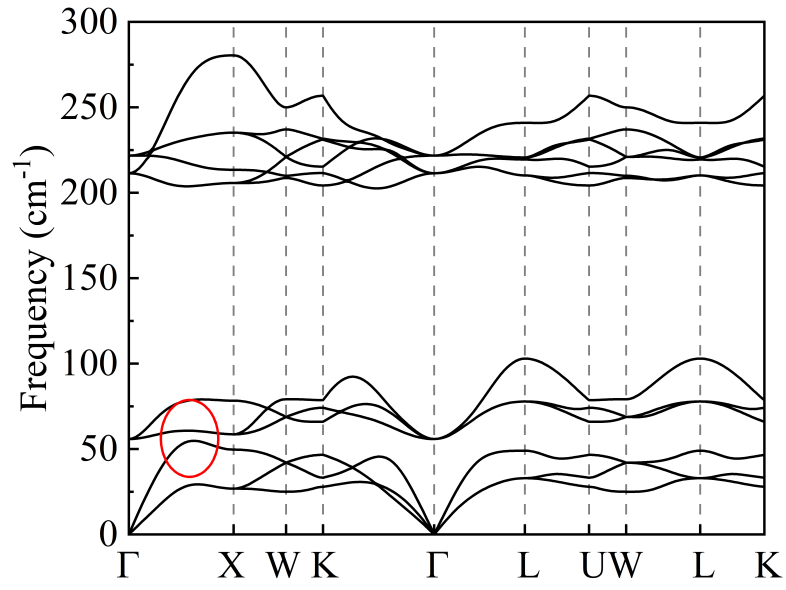

Figure S6: Calculate the phonon dispersion curve for the harmonic approximation, using  $3 \times 3 \times 3$  cells, the red circle in the figure is the anti-crossing point along the  $\Gamma$ -X direction.

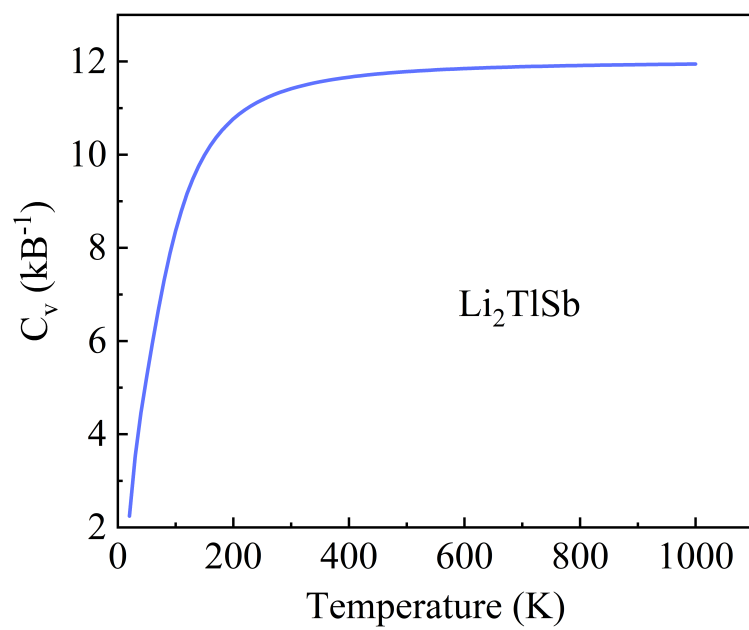

Figure S7: Calculates the heat capacity as a function of temperature for  $\text{Li}_2\text{TlSb}$ .
