# Supplementary figures and images for: Novel room-temperature full-Heusler thermoelectric material Li2TlSb
Source: Royal Society of Chemistry journal article supplement (doi:10.1039/d3cp05612k), 2024-01-01

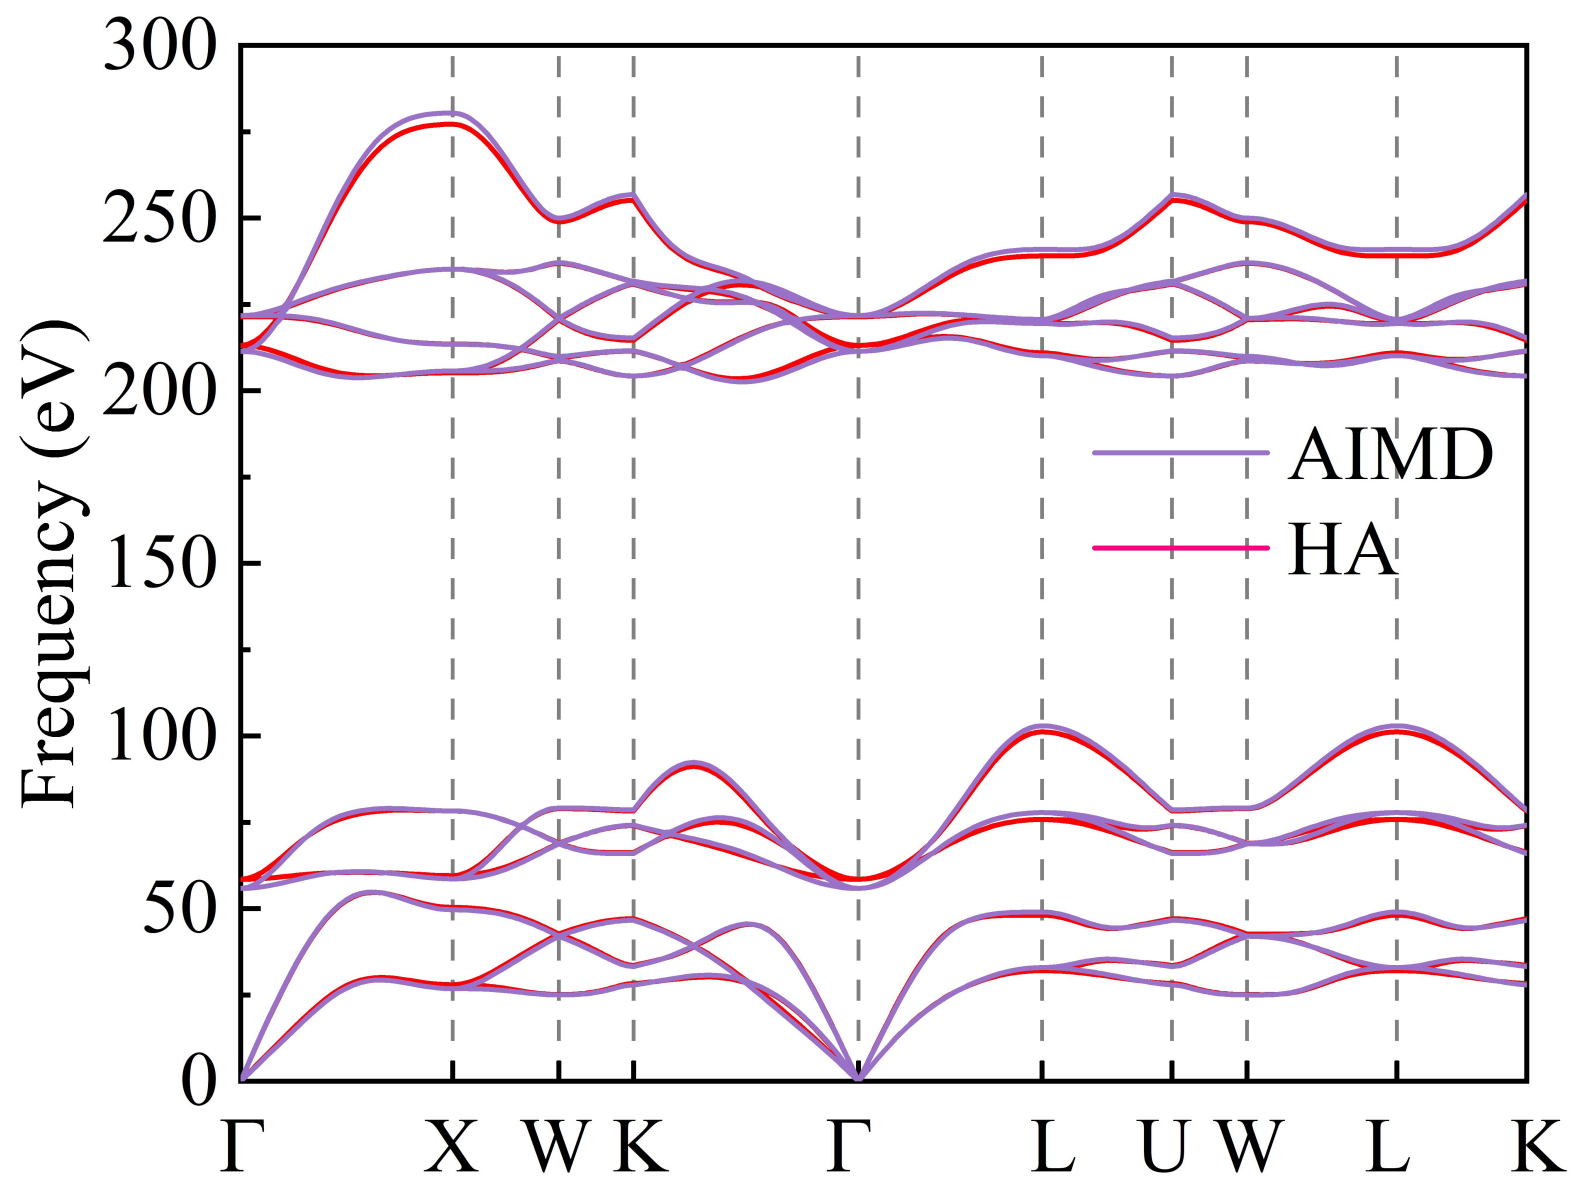

Supplement: d3cp05612k1.pdf [file d3cp05612k1.pdf]

(a)

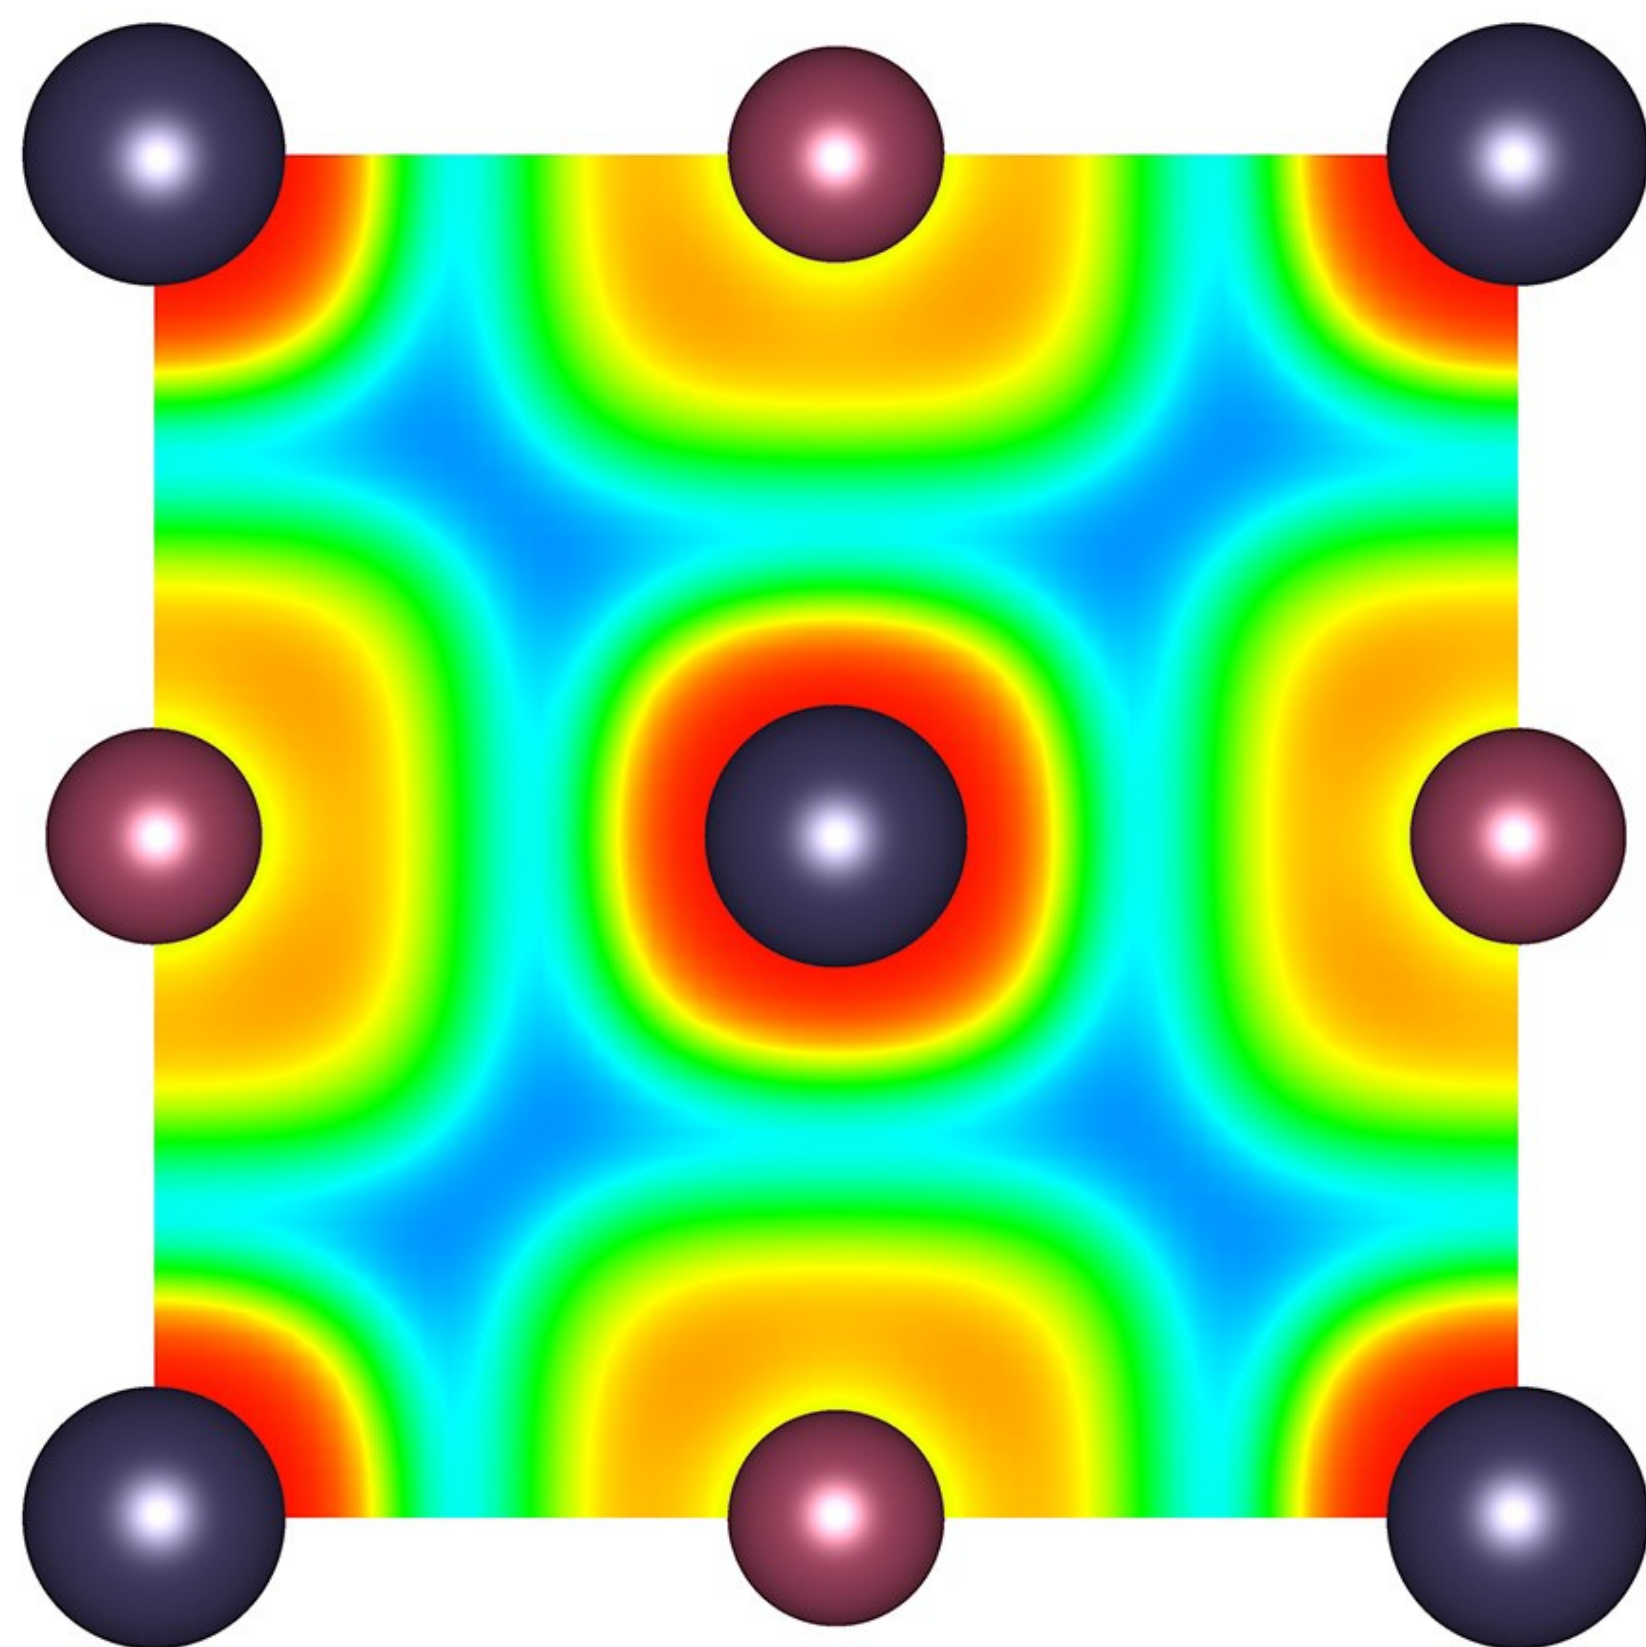

(b)

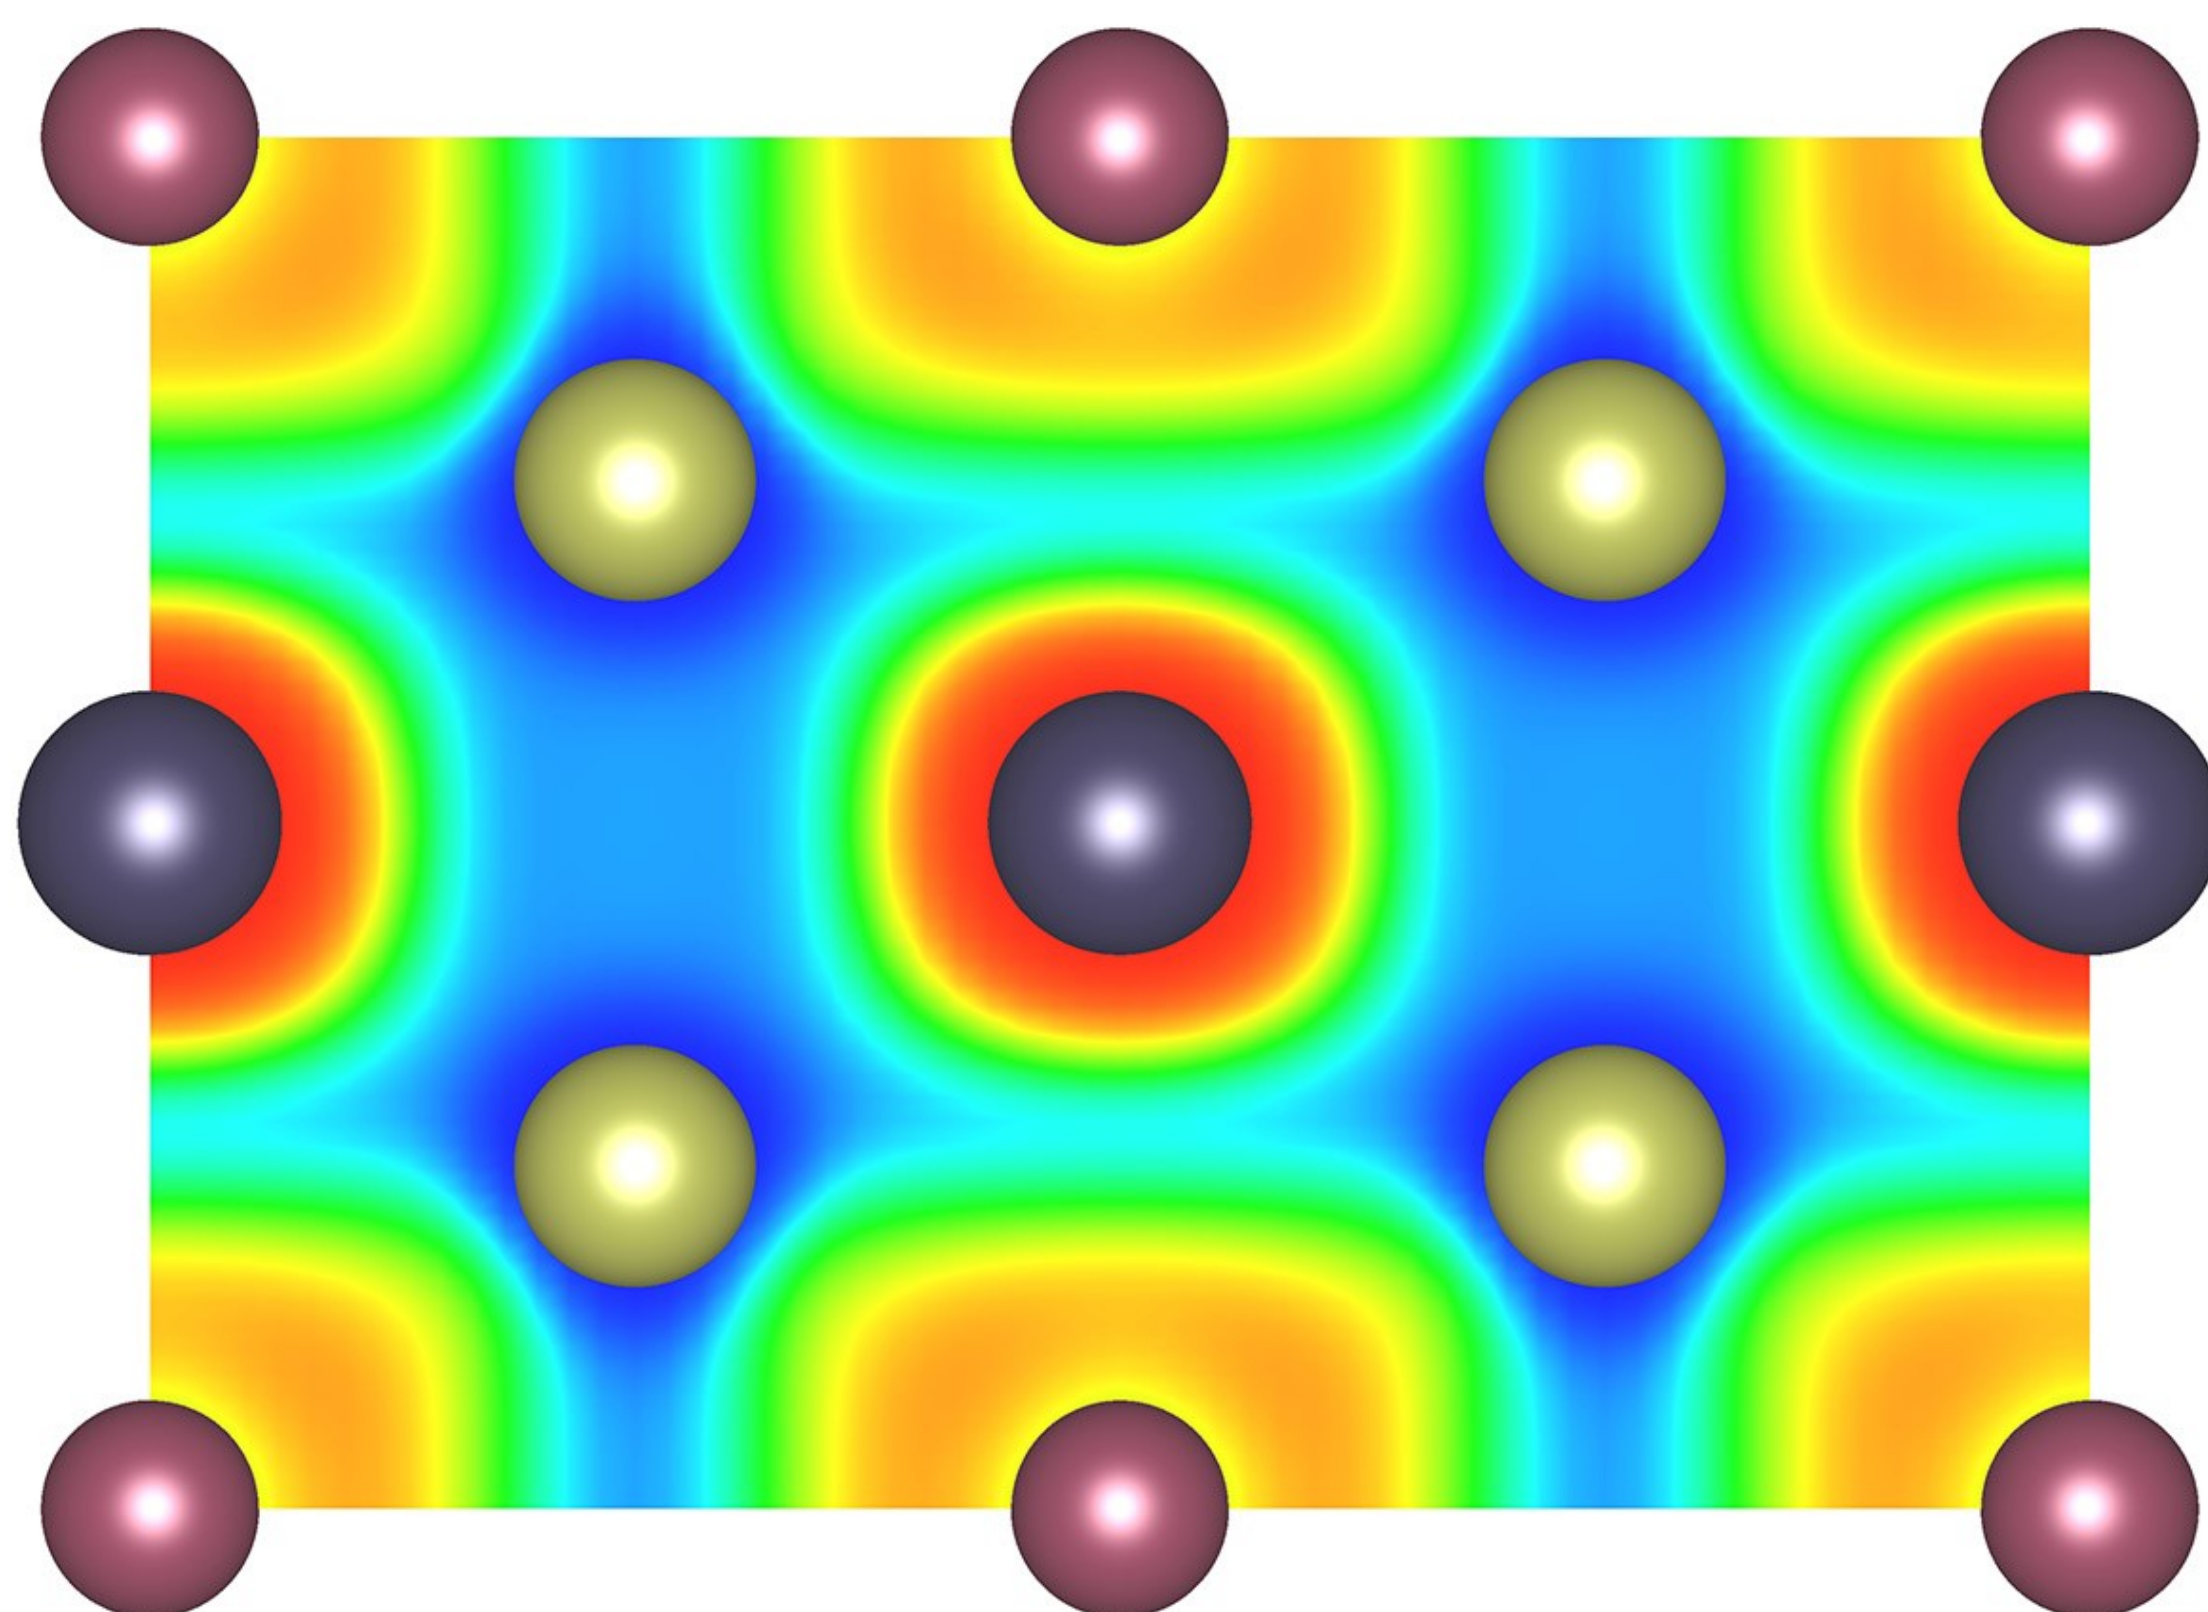

1

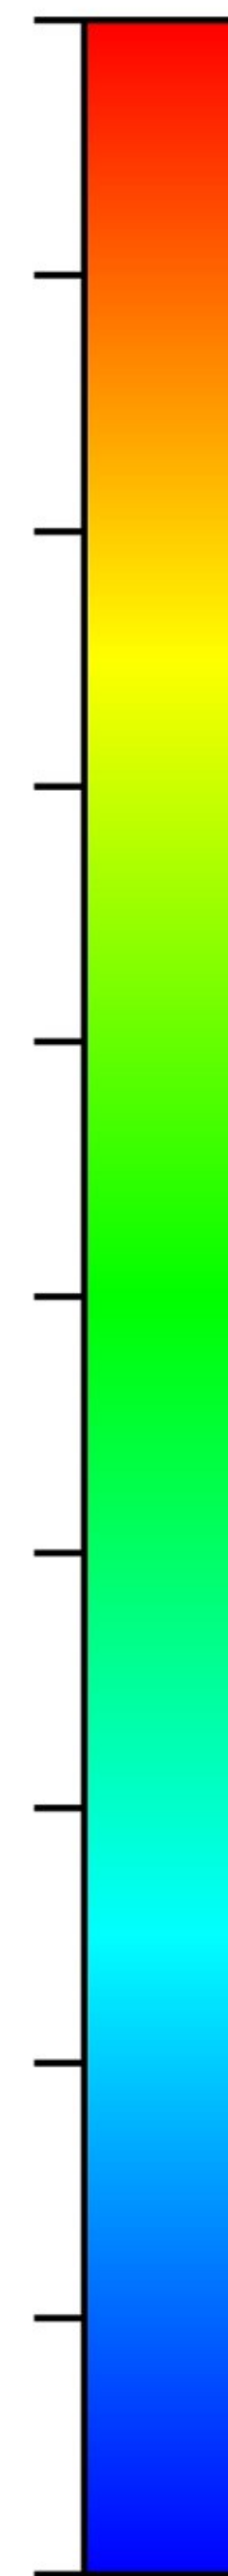

0

Supplement: d3cp05612k2.pdf [file d3cp05612k2.pdf]

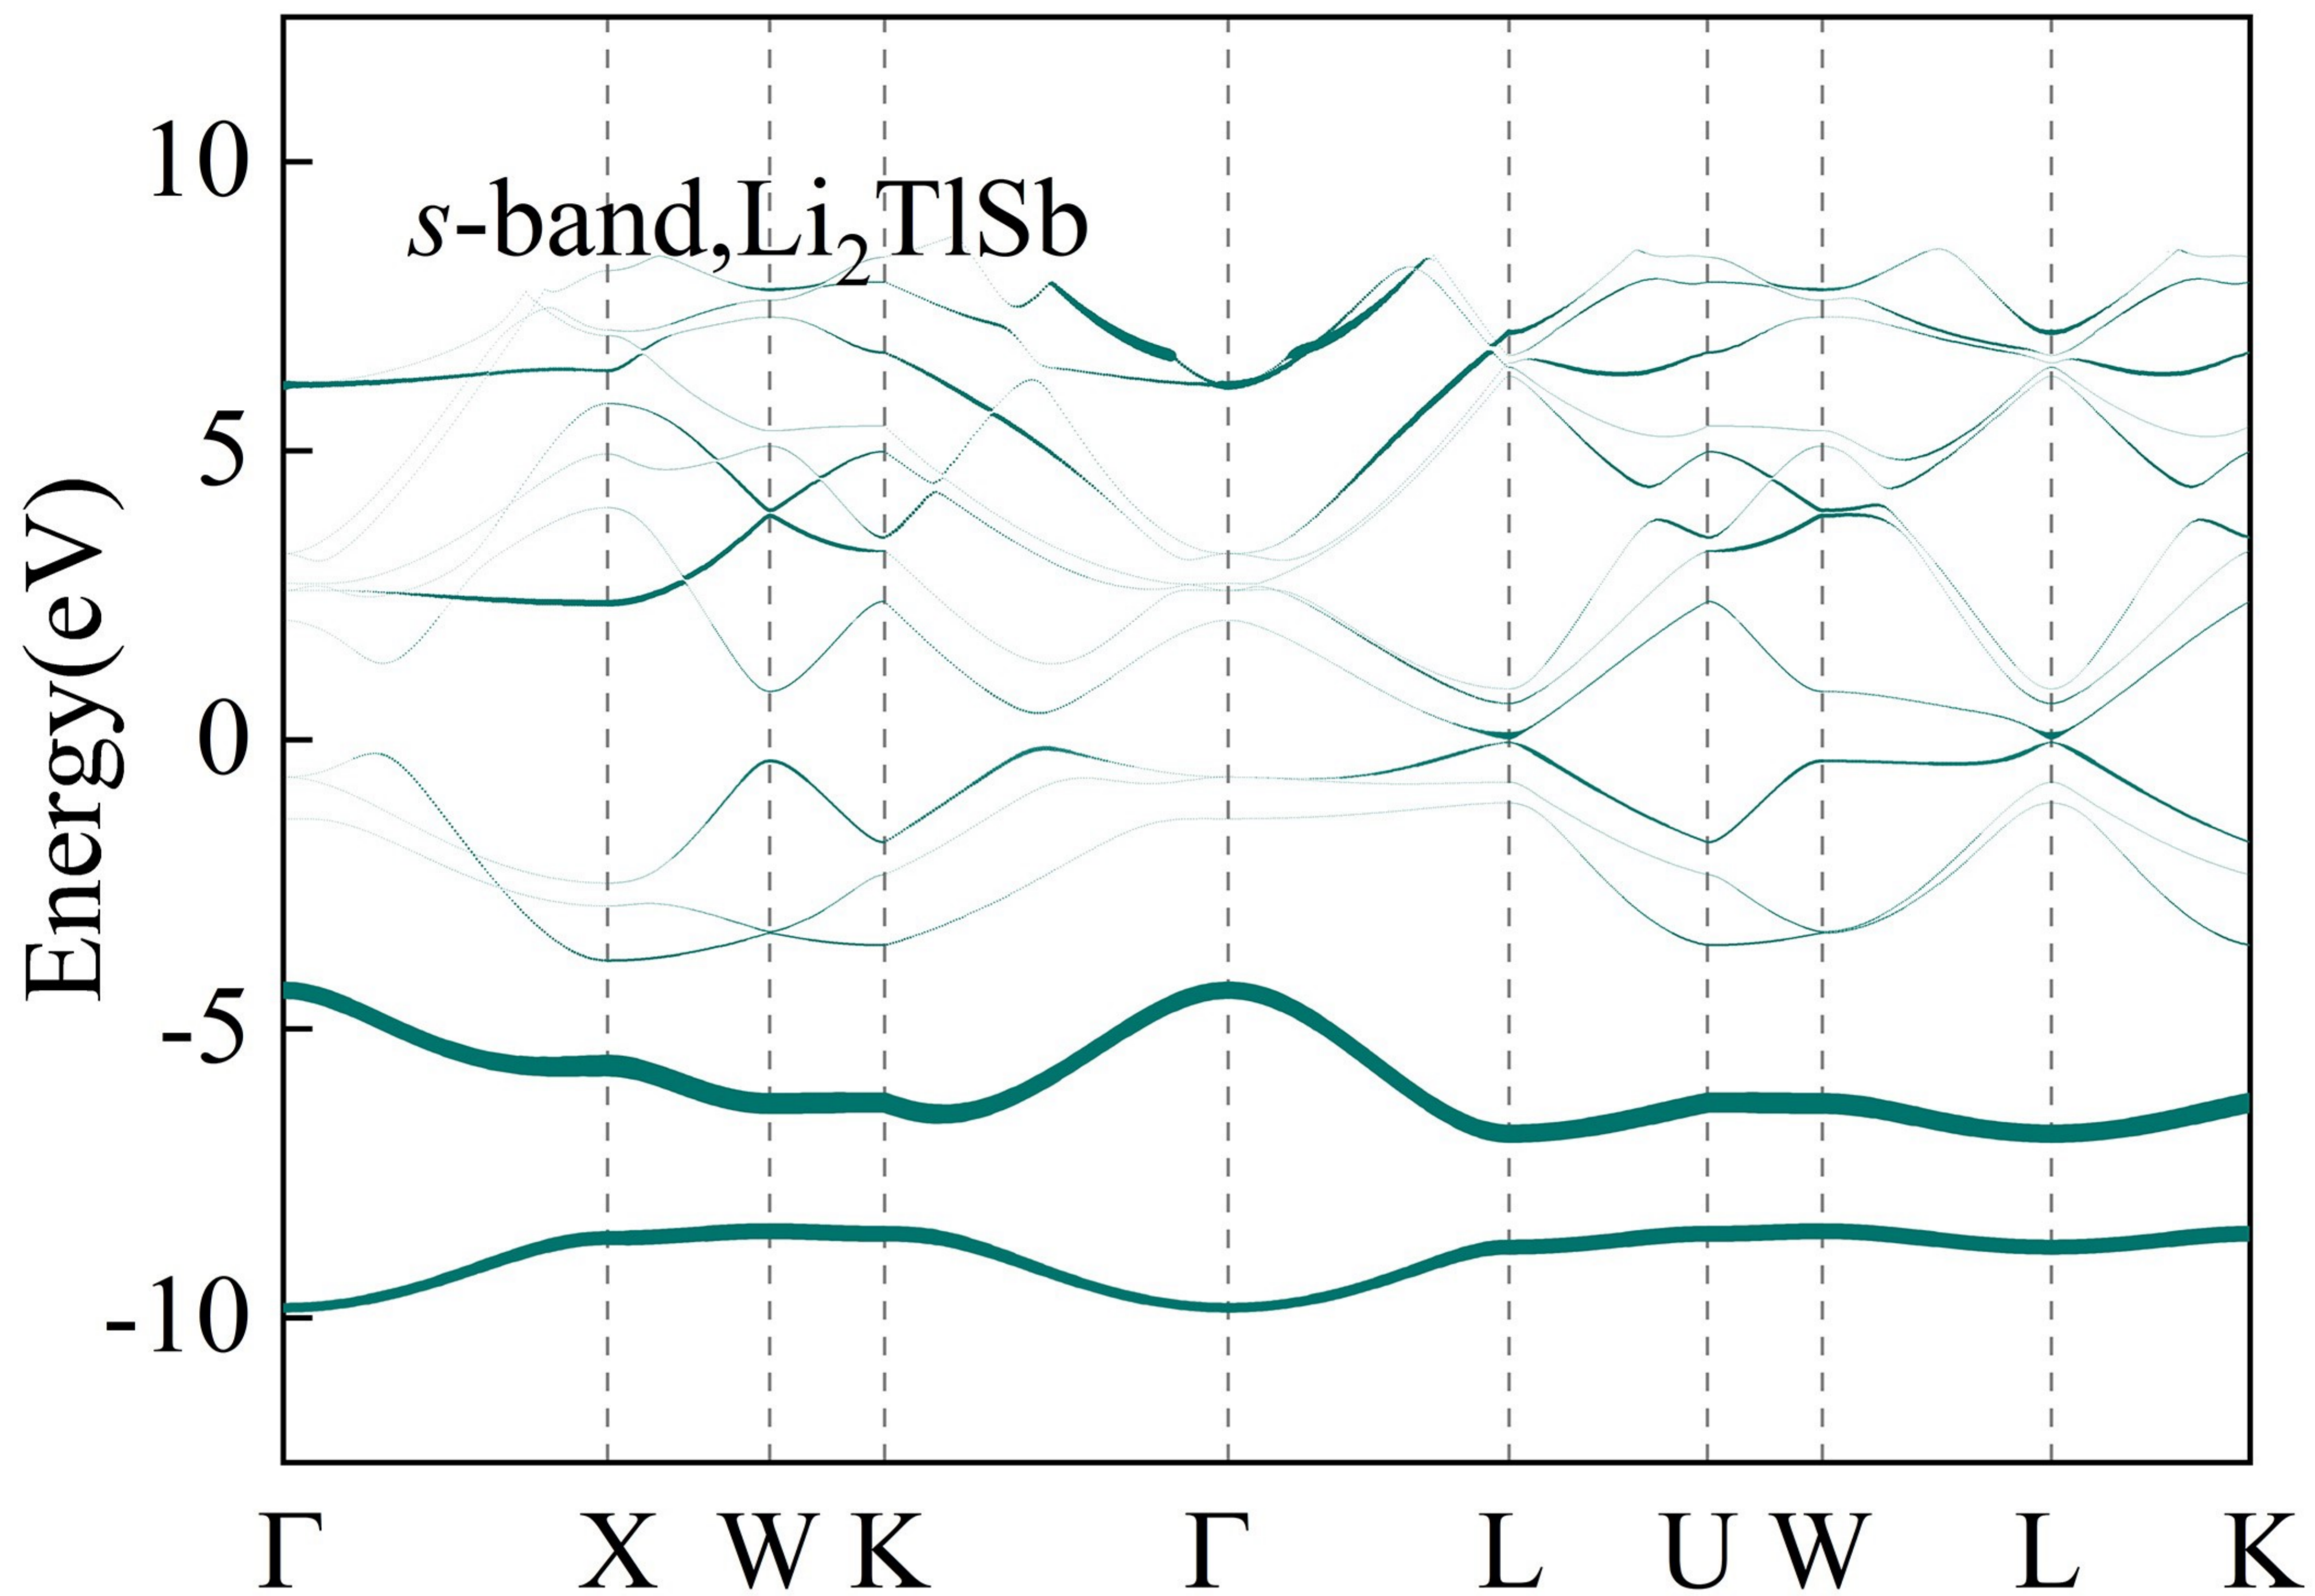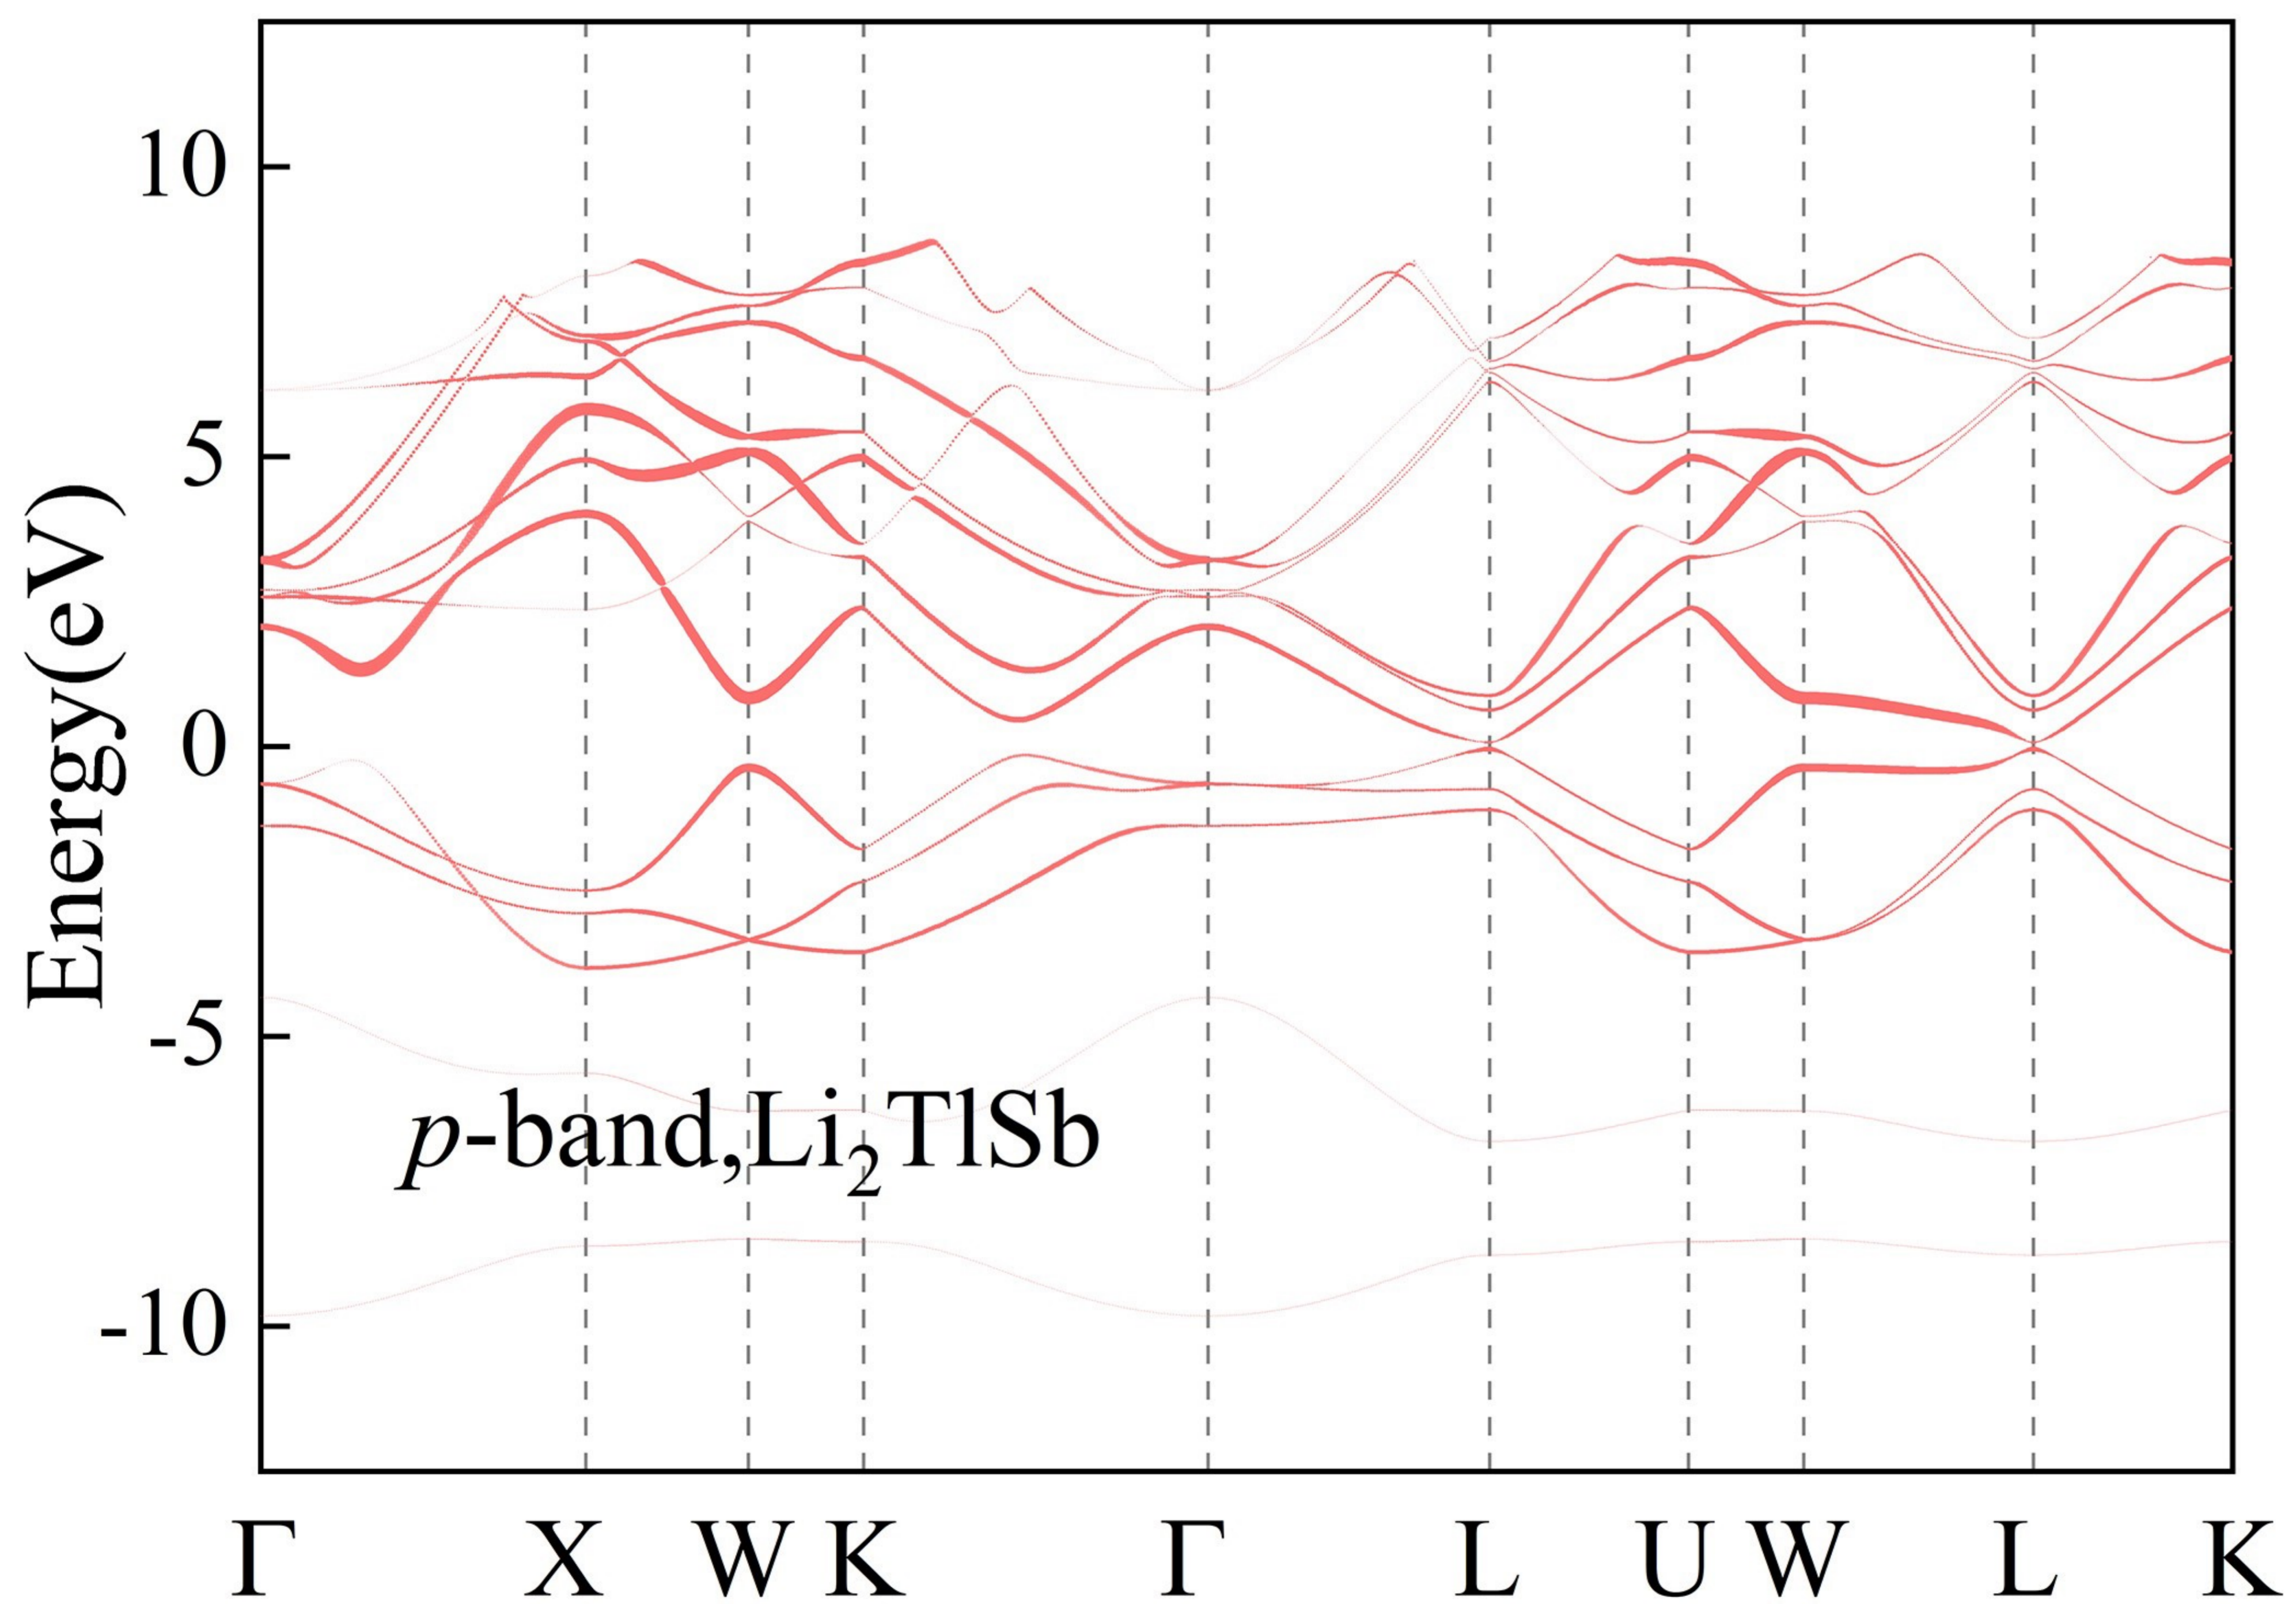

Supplement: d3cp05612k3.pdf [file d3cp05612k3.pdf]

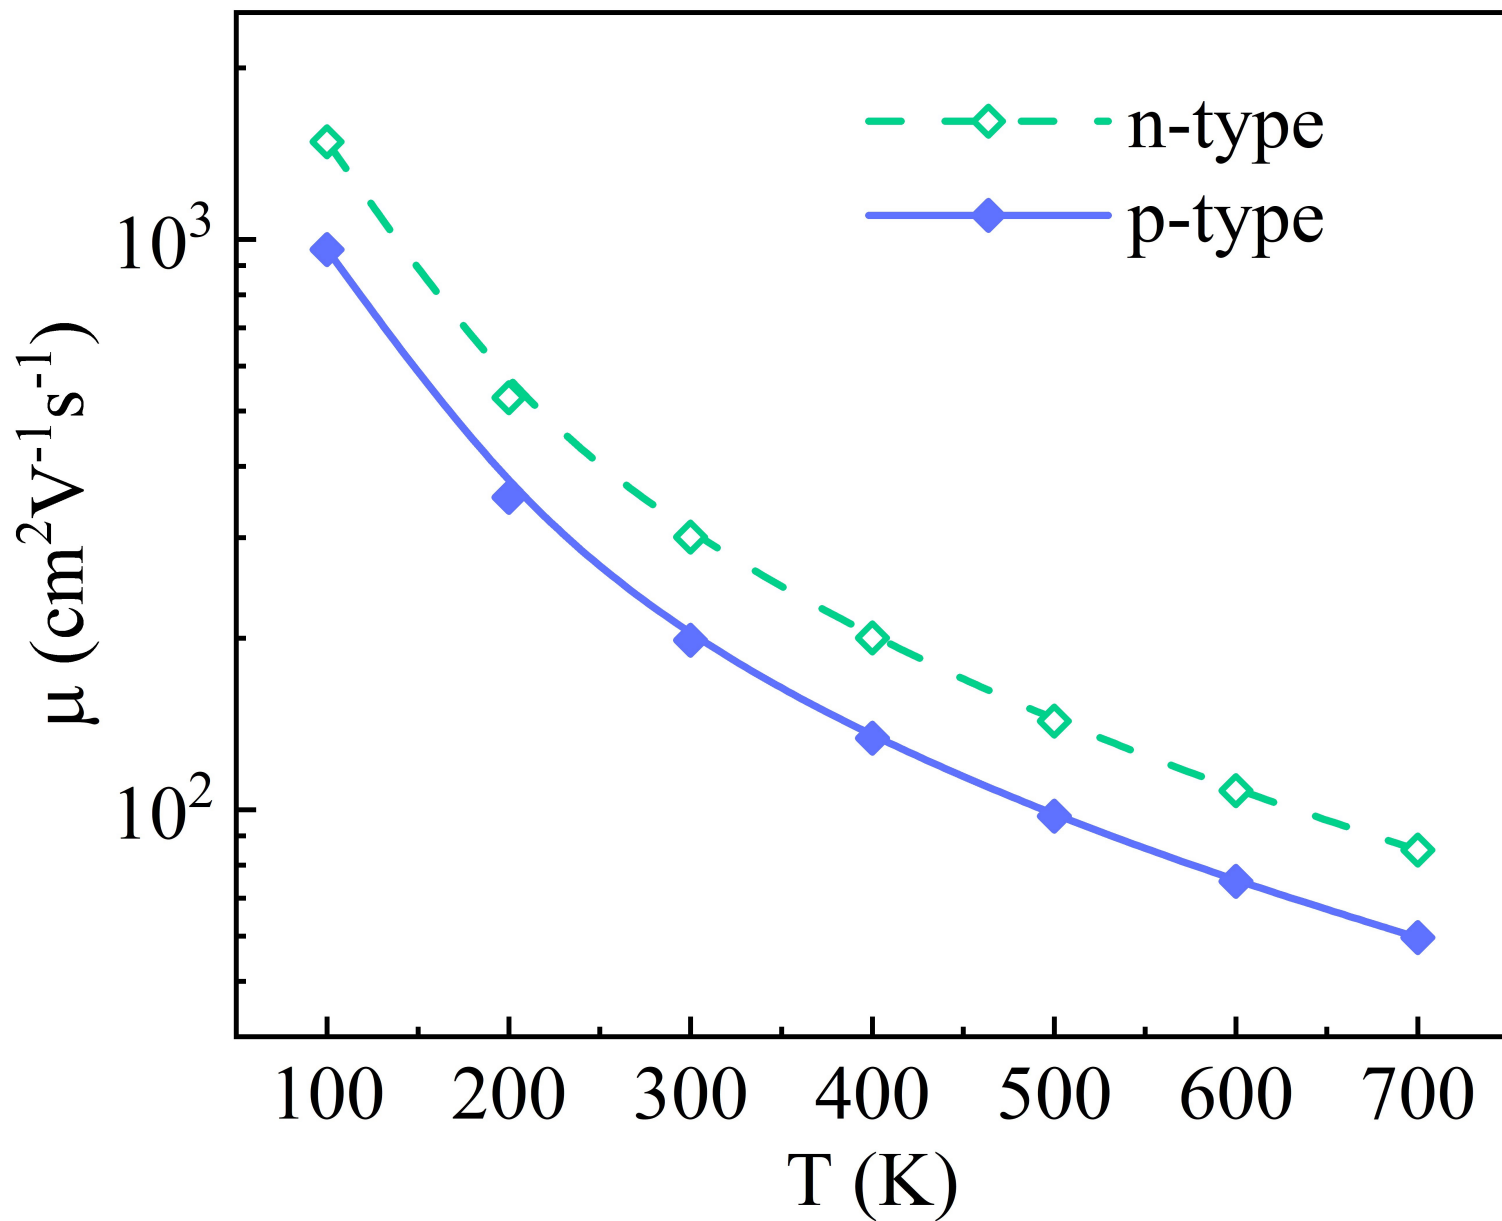

Supplement: d3cp05612k4.pdf [file d3cp05612k4.pdf]

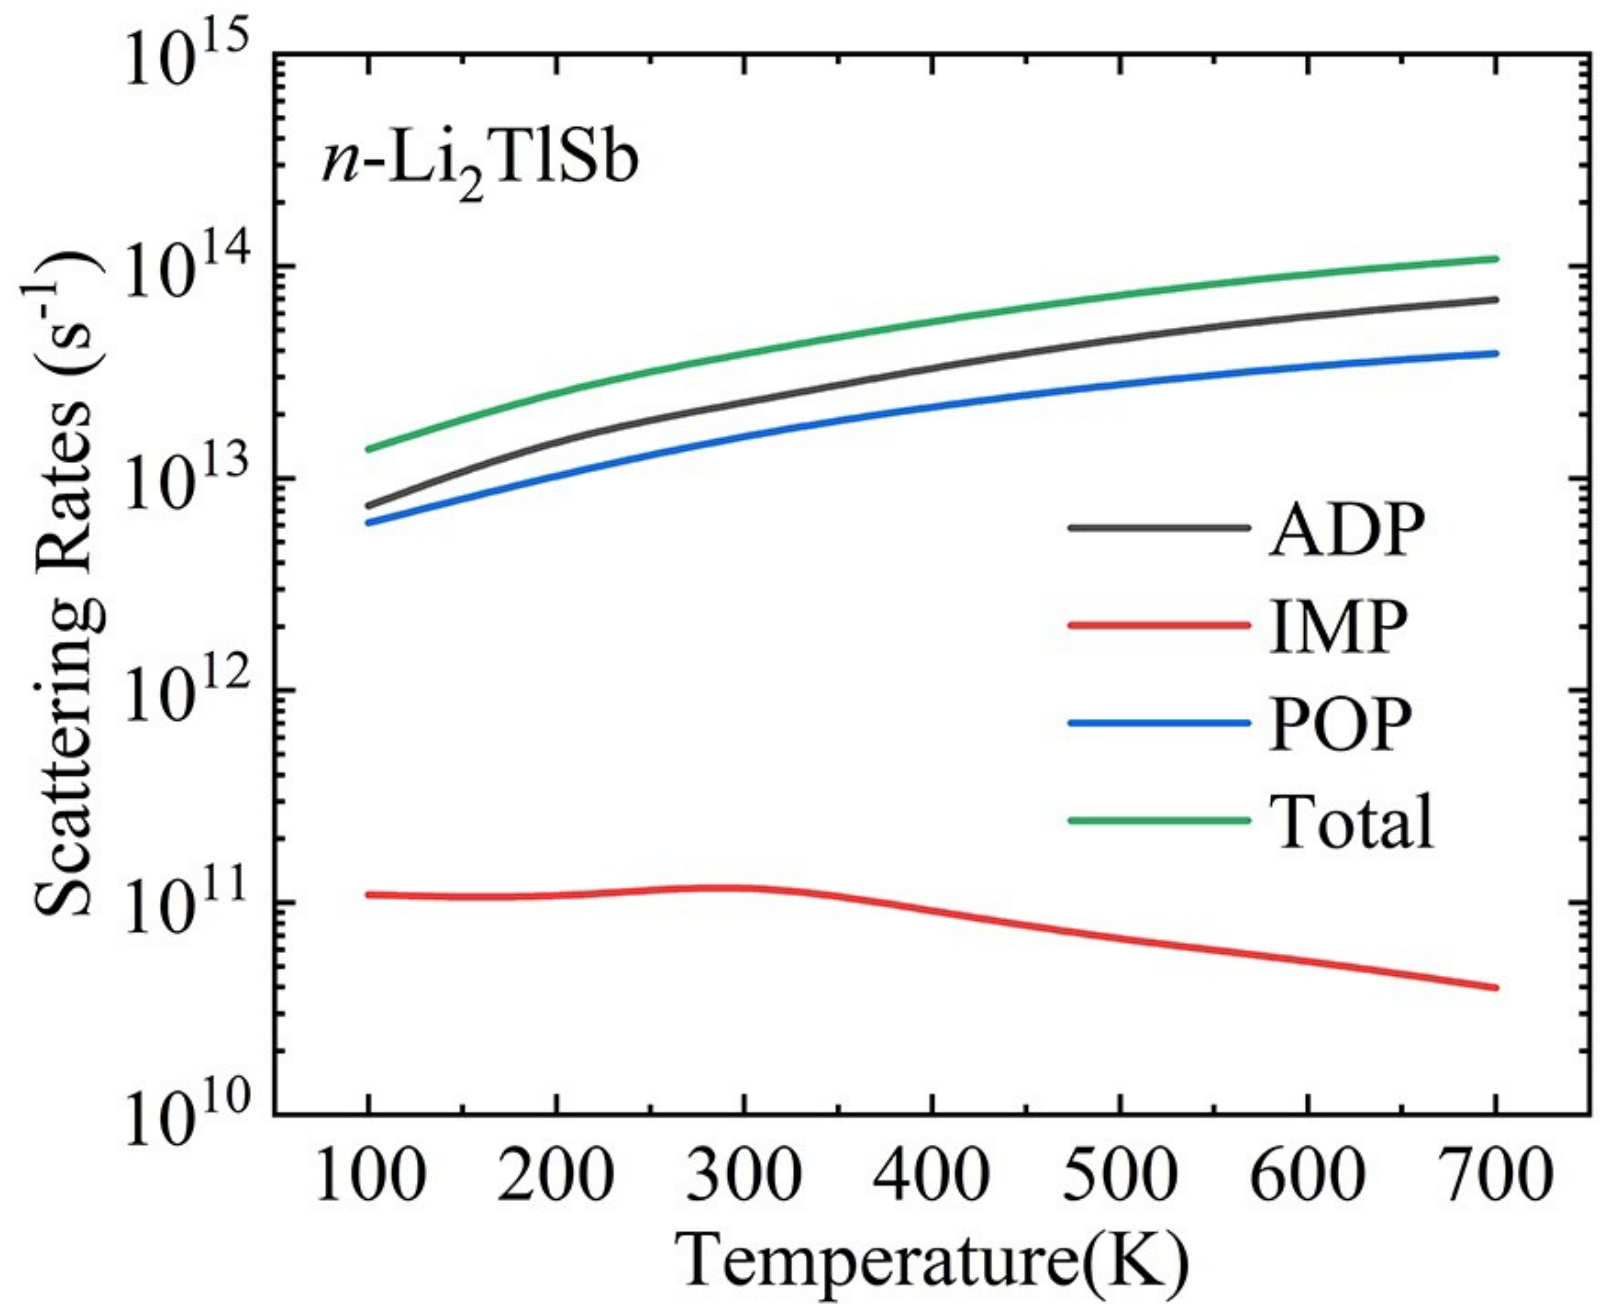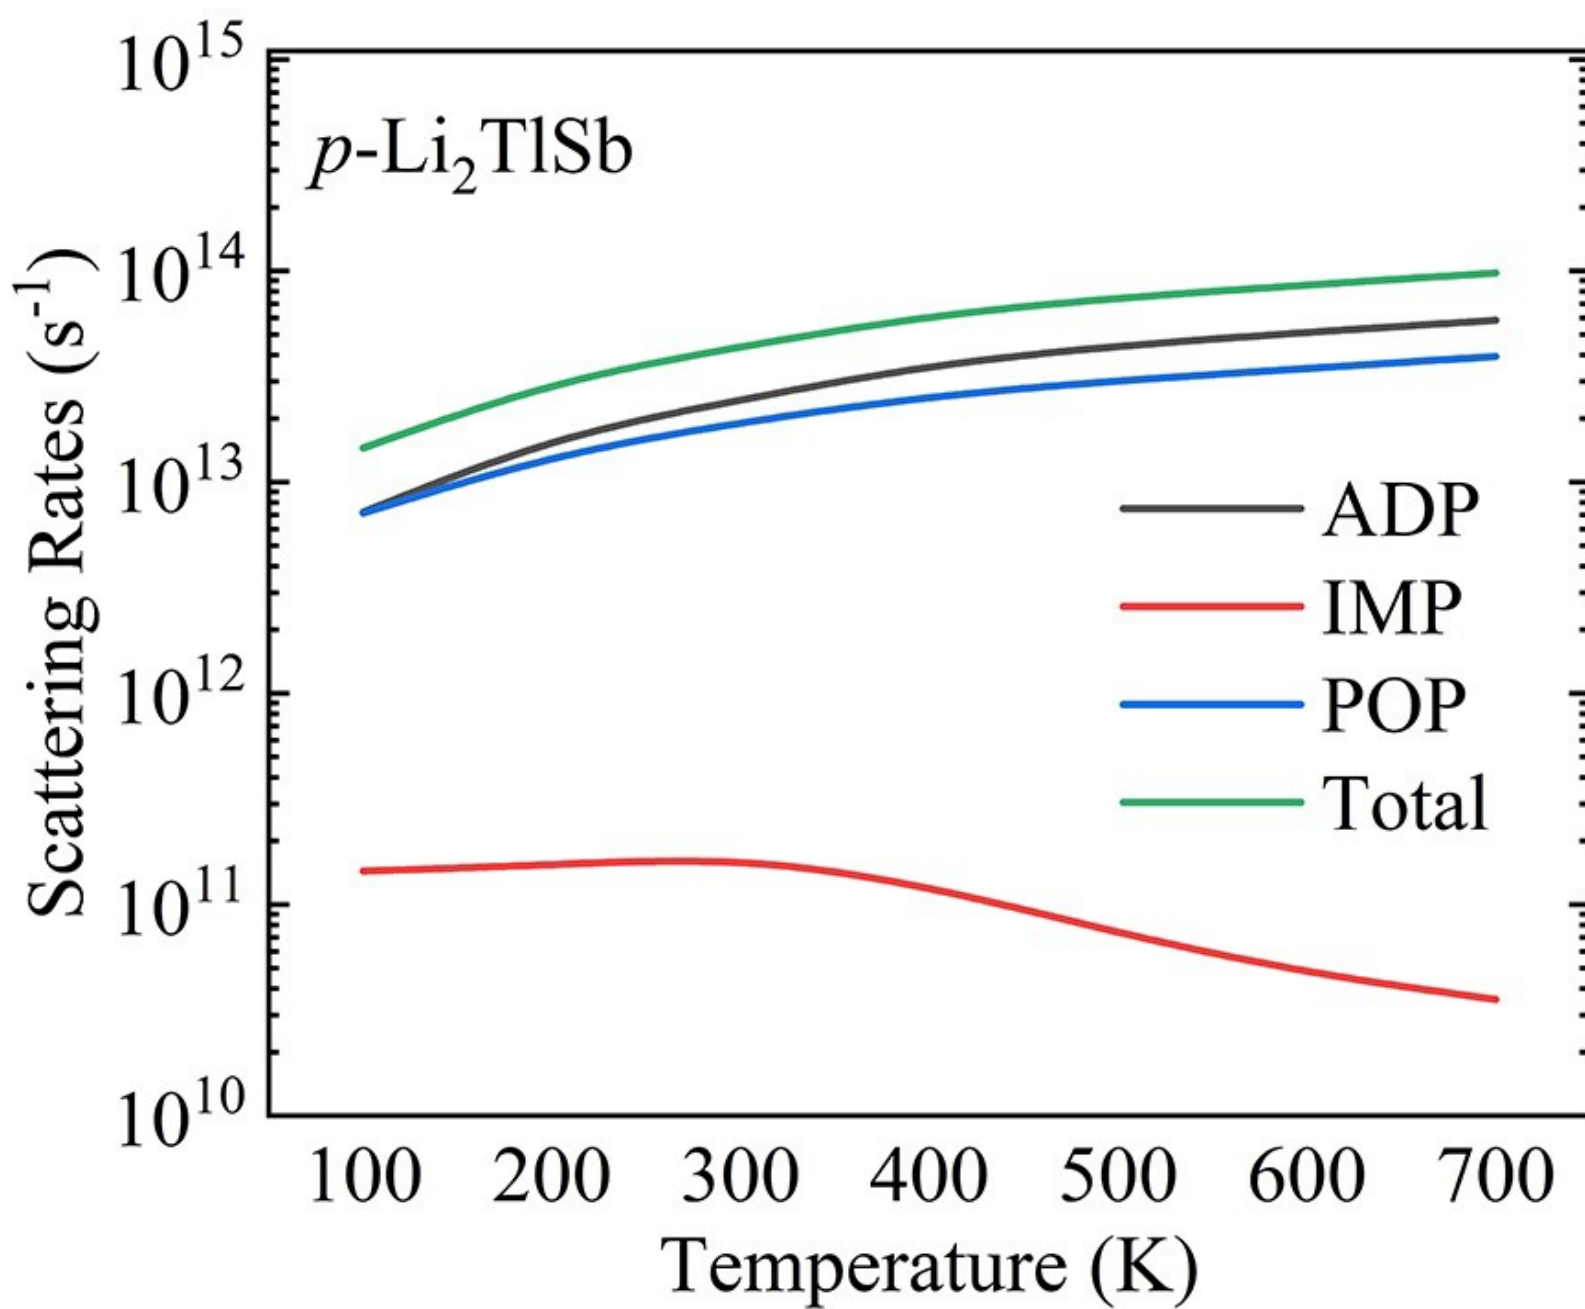

Supplement: d3cp05612k5.pdf [file d3cp05612k5.pdf]

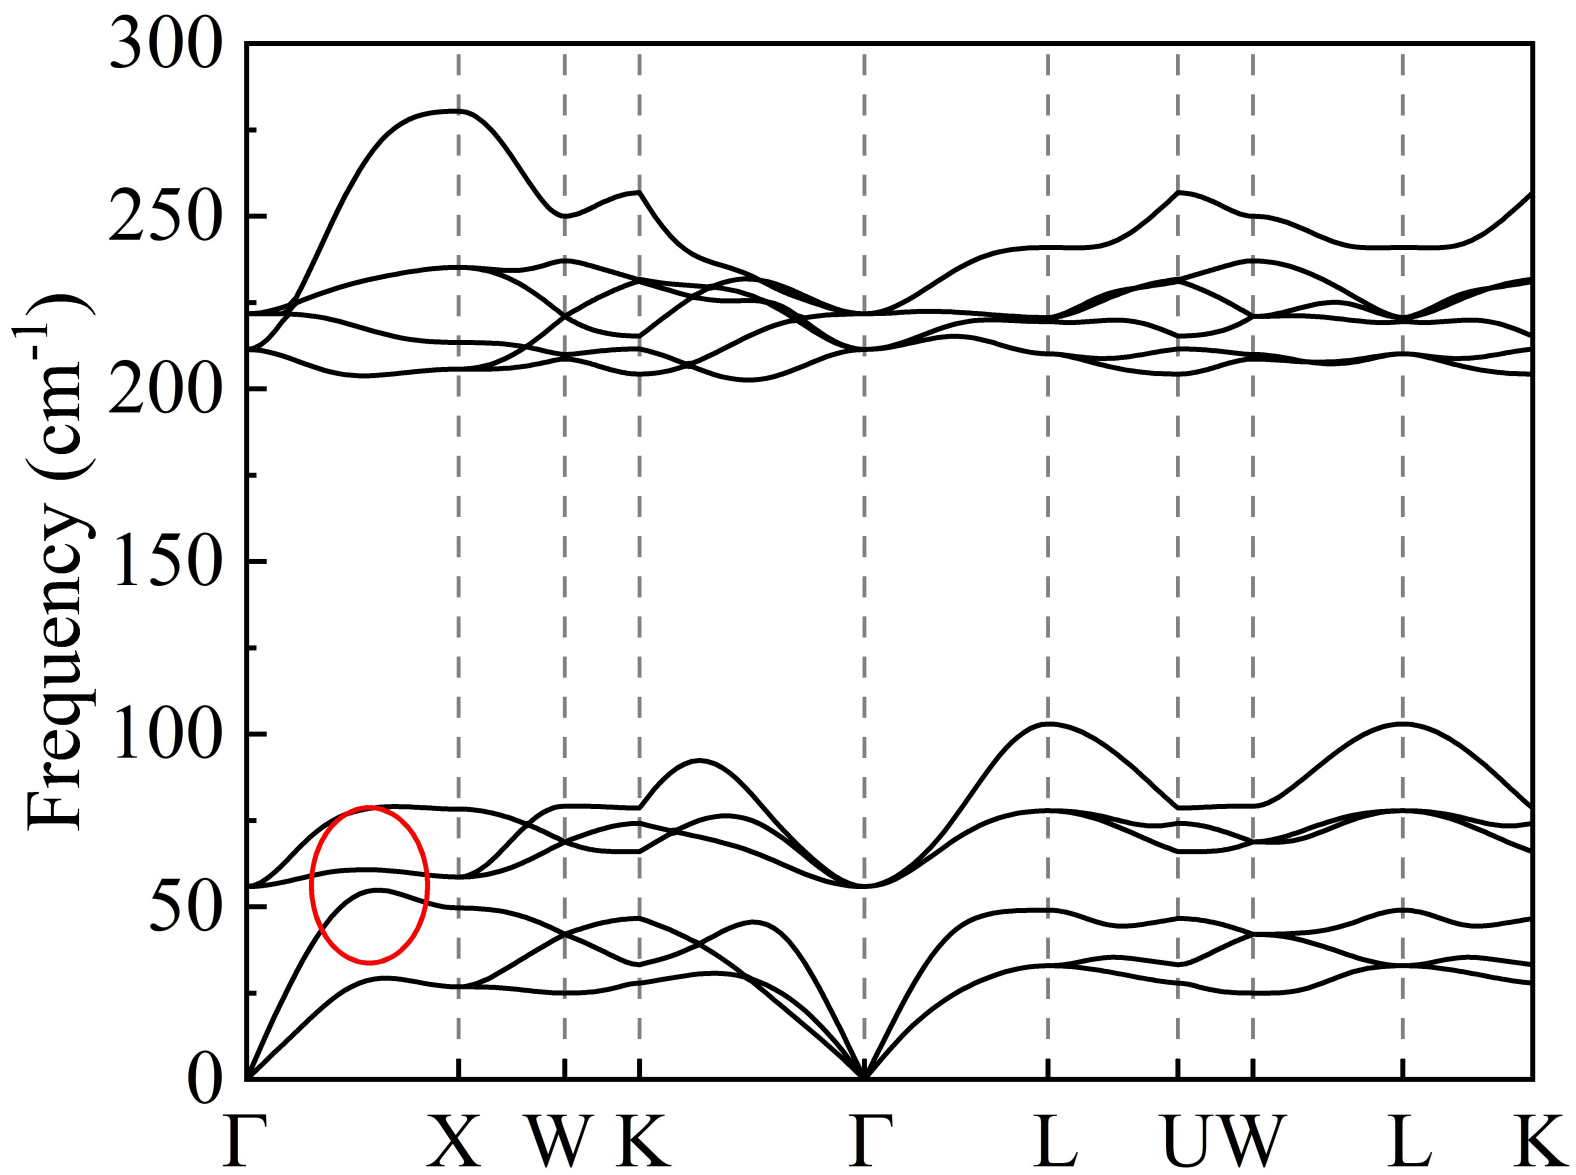

Supplement: d3cp05612k6.pdf [file d3cp05612k6.pdf]

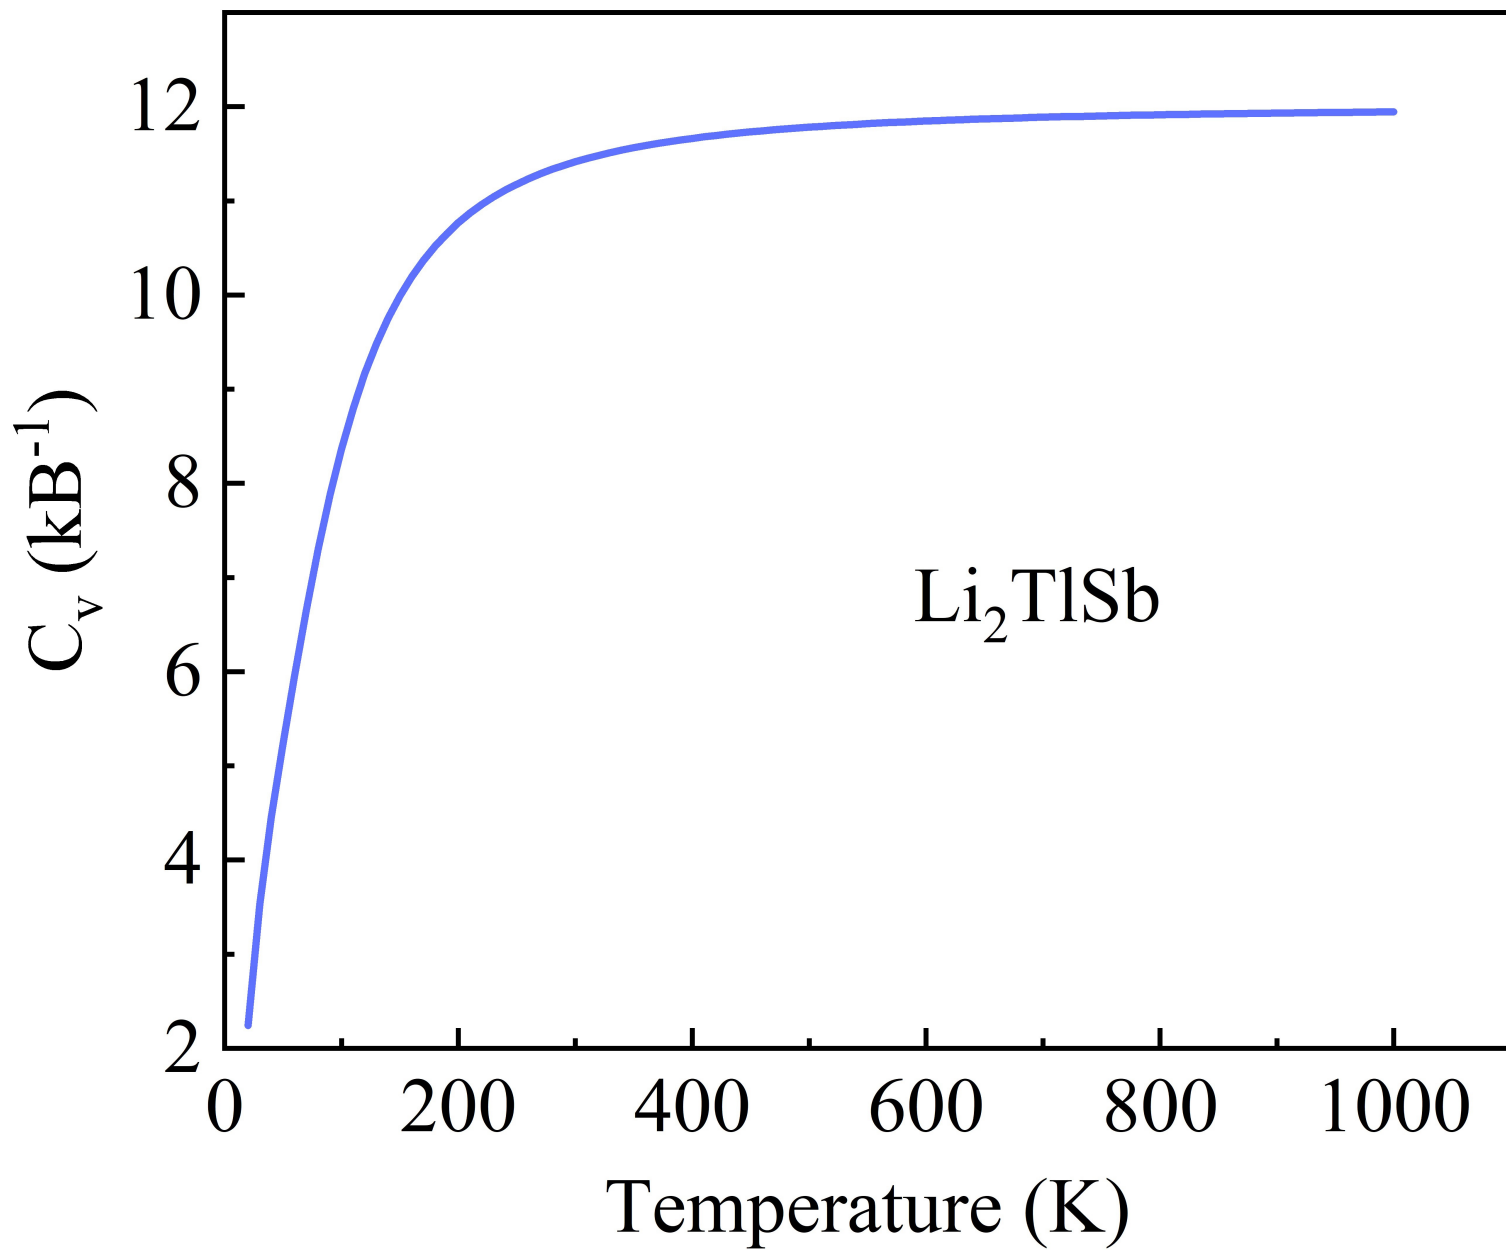

Supplement: d3cp05612k7.pdf [file d3cp05612k7.pdf]
